# Supplementary material for: Deoxynivalenol- and zearalenone-contaminated feeds alter gene expression profiles in the livers of piglets
Source: PubMed Central journal article supplement — Asian-Australas J Anim Sci. 2017 Aug 16;31(4):595–606. doi: 10.5713/ajas.17.0466 (PMC5838333; doi:10.5713/ajas.17.0466), 2017-08-16
Supplement: ajas-31-4-595-suppl.pdf [file ajas-31-4-595-suppl.pdf]

1 **Fig. S1.** Cox-Reid volume plot common dispersion among the control, DON, and ZEN treatment  
 2 groups. (A) control vs. DON (B) control vs. ZEN (C) DON vs. ZEN. The y-axis represents the  $\log_2$   
 3 fold change and the x-axis represents the mean of normalized gene volume.

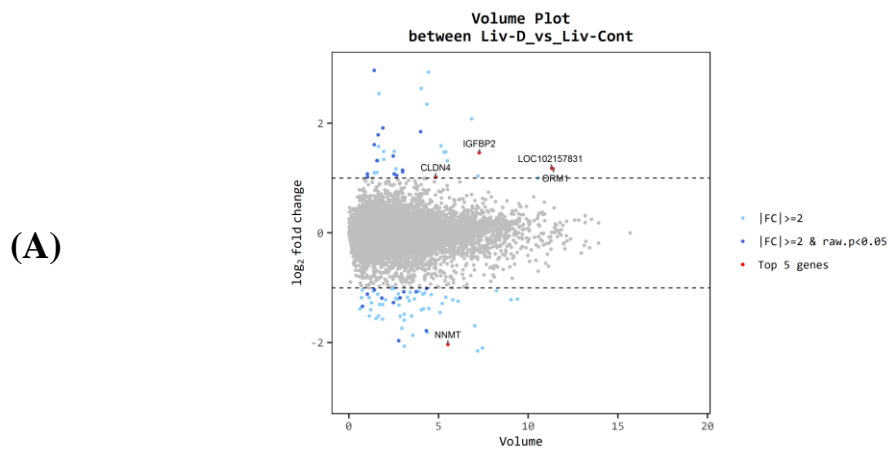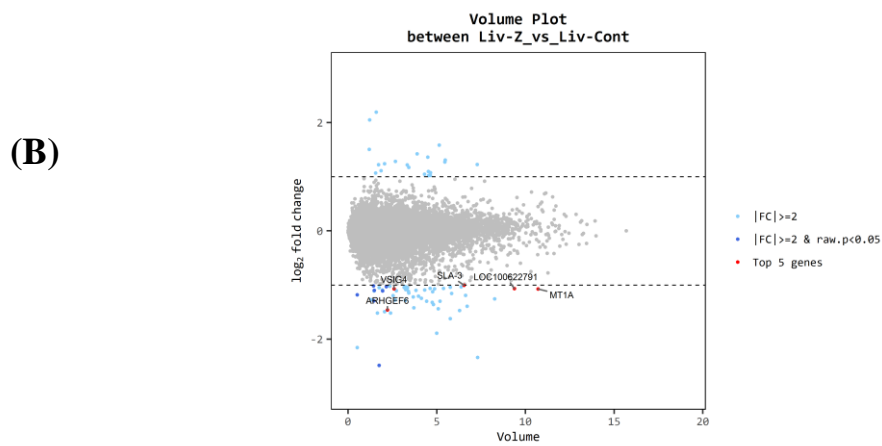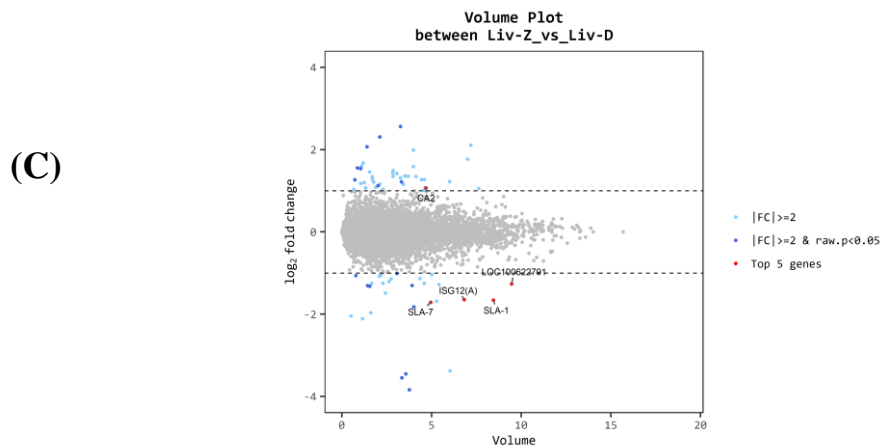

24

25 **Fig. S2.** Hierarchical clustering dendrogram of DEGs. Heatmap derived from two-way hierarchical  
26 clustering of DEGs is displayed according to significant differences in expression levels between  
27 control and DON and ZEN treatment groups. Color gradient from blue to yellow represents  
28 expression values ranging from low to high, respectively.

29

30

31

32

33

34

35

36

37

38

39

40

41

42

43

44

45

46

47

48

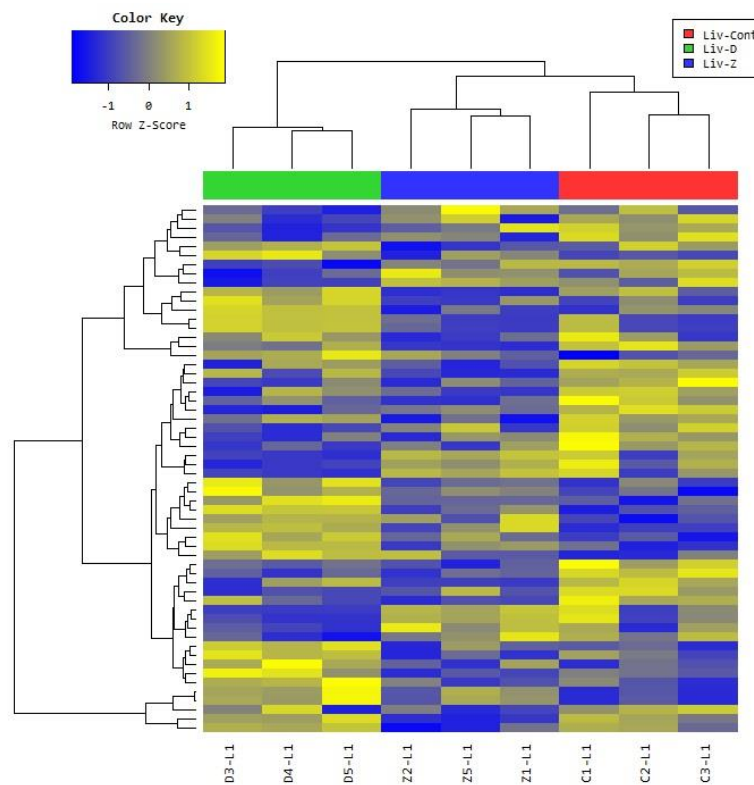

49 **Fig. S3.** Cox-Reid expression levels of the transcripts between control and mycotoxin treatment  
50 groups. (A) Control vs. DON (B) Control vs. ZEN (C) ZEN vs. DON. In each graph, the y-axis  
51 represents the transcript levels under the mycotoxin treatment and the x-axis represents transcript  
52 levels under the control treatment.

53

54

55 (A)

56

57

58

59

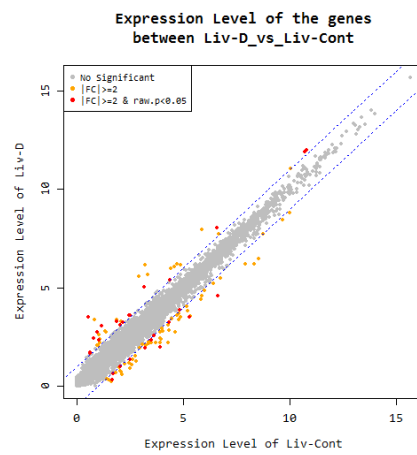

60

61

62

63 (B)

64

65

66

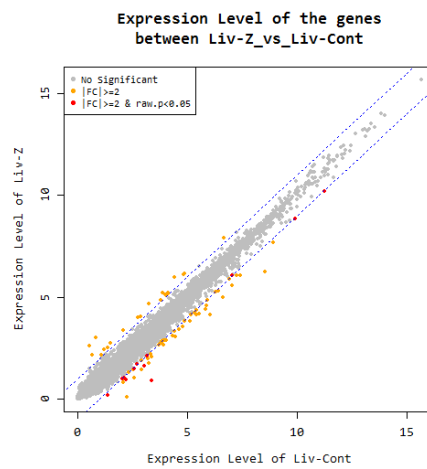

67

68

69

70 (C)

71

72

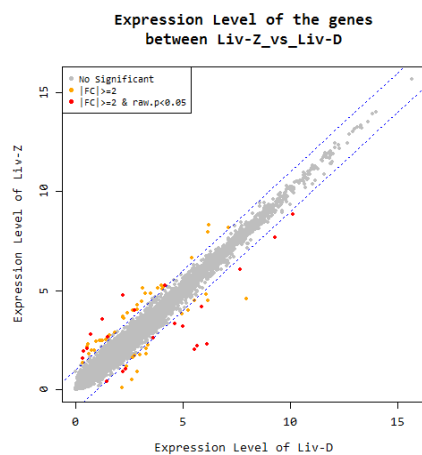

73 **Fig. S4.** The most significantly enriched KEGG pathways associated with DEGs from both DON and  
 74 ZEN dietary treatment groups.

75  
76  
77  
78  
79  
80  
81  
82  
83  
84  
85  
86  
87  
88  
89  
90  
91  
92  
93  
94  
95  
96  
97

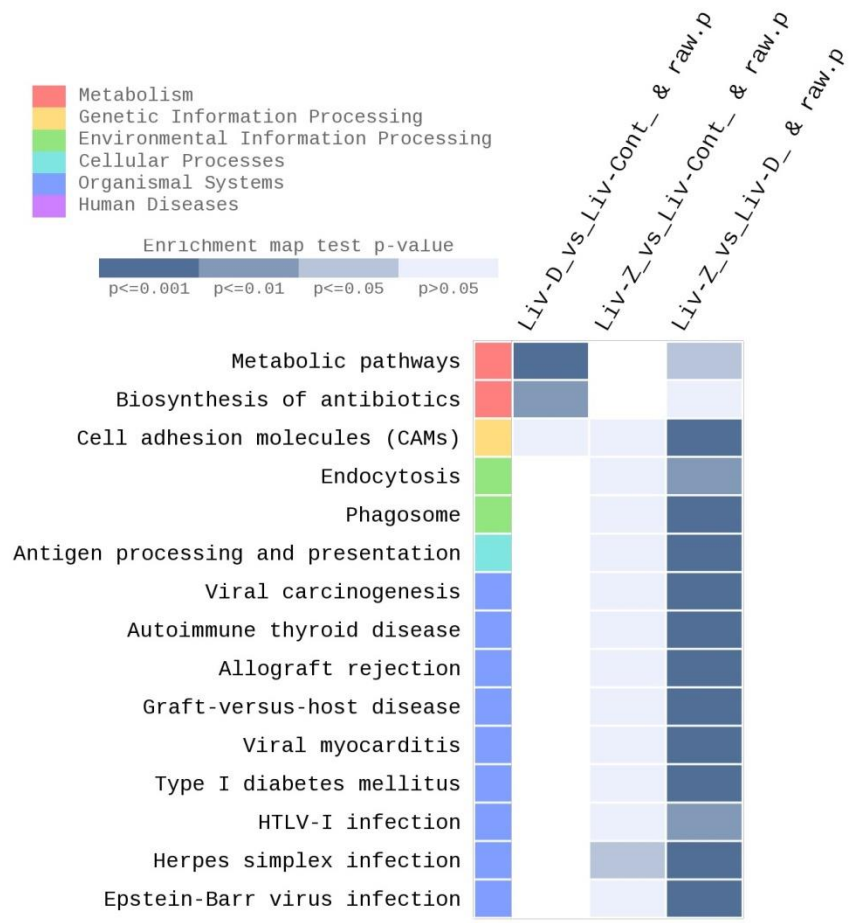

98 **Table S1.** Primers used for real-time quantitative PCR validation of DEGs from the DON and ZEN  
 99 treatments and their corresponding accession numbers and product lengths.

| S. No | Gene name <sup>1</sup> | Accession Number | Sequence                                               | Product size |
|-------|------------------------|------------------|--------------------------------------------------------|--------------|
| 1     | IGF-I                  | M31175.1         | F: ATCACATCCTCTTCGCATCTC<br>R: CCTGTGGGCTTGTTGAAATAAA  | 158          |
| 2     | ORM1                   | XM_005660371     | F: GTACAATGAGTCGGCCAGAT<br>R: CTCAGGGAGCTGTCGTTATAG    | 133          |
| 3     | UBD                    | NM_001160088     | F: CTCATGGCCTACTTGGAAAGAT<br>R: CTCCTTGTCAATGCCGTAAGA  | 151          |
| 4     | SLA-1                  | NM_001097431     | F: AGGACTATTGGGATGAGGAGAC<br>R: CCCAAGTAGCAGCCAAACA    | 142          |
| 5     | HMGCS2                 | NM_214380        | F: CTTGCCCTGGAGGTCTATTTTC<br>R: GTCAGGCACAAGGAGTTGAT   | 155          |
| 6     | MT1A                   | NM_001001266     | F: CGTGCAAAGCCTGCAGAT<br>R: CACAGCAGCTGCACTTGT         | 123          |
| 7     | NOCT                   | XM_003129187     | F: TAGCCTACCAGCCCGATATAC<br>R: CCATCGGGTCCATTGTTATGT   | 154          |
| 8     | TRHDE                  | XM_003355521     | F: GAAGATGTGTGGCTGAAGGA<br>R: CTGTGATACTGGATGGGAACTG   | 162          |
| 9     | NNMT                   | NM_001123146     | F: ATCATTGCCACCGACTACAC<br>R: CCGTTCCTTGACTCTGTTC      | 136          |
| 10    | ARHGEF6                | XM_013991029     | F: GGAGCGGTACCTCATGTTATT<br>R: GTCATTGCCTTCCGTTTCATC   | 139          |
| 11    | CLDN4                  | NM_001161637     | F: CAACTGCGTGGATGATGAGA<br>R: ATTGTAGAAGTCGCGGATGAC    | 133          |
| 12    | PON3                   | NM_001044604     | F: CCTGATACGGGAGATATTTGGG<br>R: TGGCATACTCGGTGCTTATC   | 145          |
| 13    | GAPDH                  | AF017079         | F: GTCTGGAGAAACCTGCCAAATA<br>R: CCCAGCATCAAAGGTAGAAGAG | 152          |
| 14    | β- actin               | AY550069         | F: TCCACGAAACTACCTTCAACTC<br>R: GATCTCCTTCTGCATCCTGTC  | 131          |

100

101 <sup>1</sup>IGF-I= Insulin-like growth factor I; ORM1= Orosomuroid 1; UBD= Ubiquitin D; SLA-1= Src-Like-Adaptor-1;

102 HMGCS2= Hydroxy-3-methylglutaryl-CoA synthase 2; MT1A= Metallothionein 1A; NOCT= Nocturnin;

103 TRHDE= Thyrotropin-releasing hormone degrading enzyme; NNMT= Nicotinamide N-methyltransferase;

104 ARHGEF6= Rho guanine nucleotide exchange factor 6; CLDN4= Claudin 4; PON3= Paraoxonase 3; GAPDH=

105 Glyceraldehydes 3-phosphate, and β- actin= Beta actin.

106

107

108

109
